# Supplementary material
Source: publisher figshare collection journal article supplement (https://frontiersin.figshare.com/ndownloader/files/28283418)
Supplement: Supplementary file [file 28283418]

## Prognostic implication of the m<sup>6</sup>A RNA methylation regulators in rectal cancer

Yajie Chen <sup>1,2,#</sup>, Shanshan Wang <sup>2,3,#</sup>, William C. Cho <sup>4</sup>, Xiang Zhou <sup>2,3,5,\*</sup>, and Zhen Zhang <sup>1,2,\*</sup>

<sup>1</sup> Department of Radiation Oncology, Fudan University Shanghai Cancer Center, Fudan University, Shanghai 200032, China

<sup>2</sup> Department of Oncology, Shanghai Medical College, Fudan University, Shanghai 200032, China

<sup>3</sup> Fudan University Shanghai Cancer Center and Institutes of Biomedical Sciences, Fudan University, Shanghai 200032, China

<sup>4</sup> Department of Clinical Oncology, Queen Elizabeth Hospital, Hong Kong, China

<sup>5</sup> Key Laboratory of Breast Cancer in Shanghai, Fudan University Shanghai Cancer Center, Fudan University, Shanghai, China

Running Title: The prognostic value of m<sup>6</sup>A regulators in RC

<sup>#</sup> Equal contribution.

<sup>\*</sup> Corresponding Authors:

Zhen Zhang, Department of Radiation Oncology, Fudan University Shanghai Cancer Center, Shanghai 200032, P. R. China. Email: [zhen\\_zhang@fudan.edu.cn](mailto:zhen_zhang@fudan.edu.cn)

Xiang Zhou, Fudan University Shanghai Cancer Center and Institutes of Biomedical Sciences, Fudan University, Shanghai 200032, P. R. China. Email: [xiangzhou@fudan.edu.cn](mailto:xiangzhou@fudan.edu.cn)

Supplementary figures

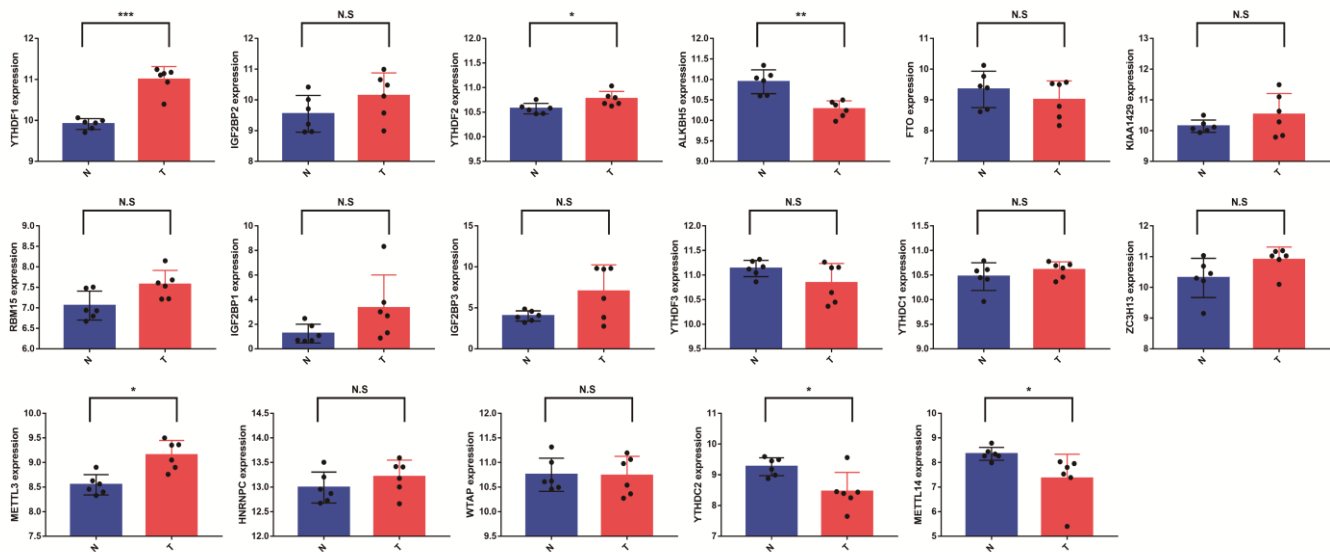

**Supplementary Fig. 1** The expression of the 17 m<sup>6</sup>A regulator genes in the 6 paired rectal tumors and normal rectal samples (paired T-tests). \**P* < 0.05, \*\**P* < 0.01, and \*\*\**P* < 0.001.

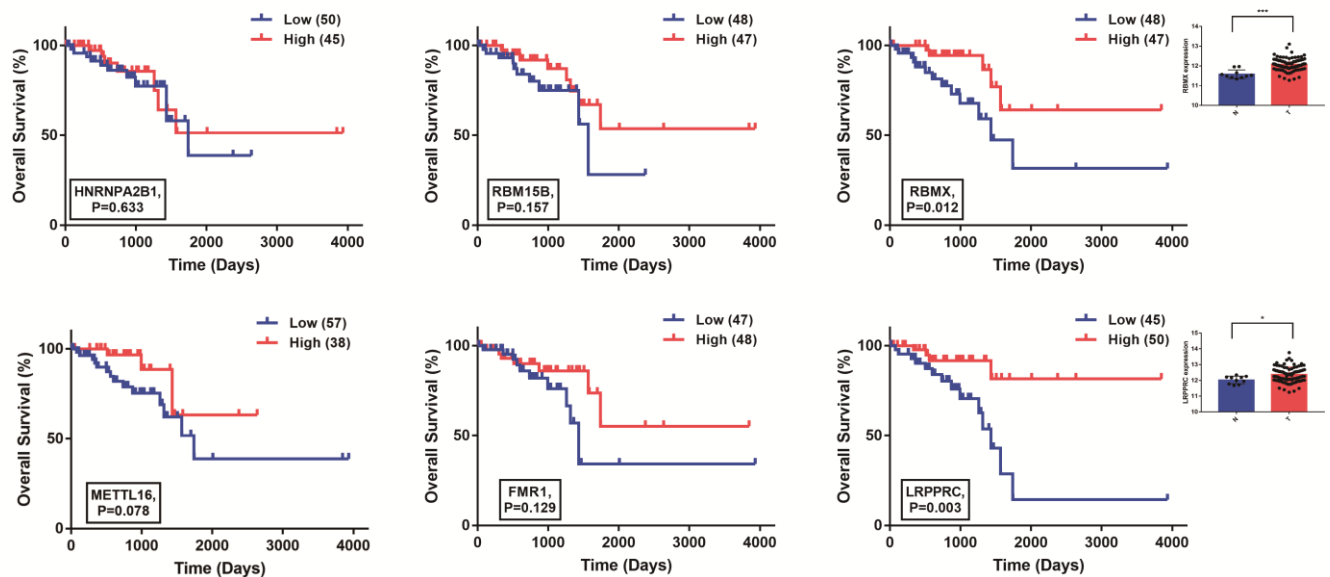

**Supplementary Fig. 2** Comparison of overall survival with differential expression of the 6 m<sup>6</sup>A regulators: HNRNPA2B1, RBM15B, RBMX, METTL16, FMR1, and LRPPRC.
